**High resolution dermal ultrasound (US) combined with superficial radiation therapy (SRT) versus non-image guided SRT or external beam radiotherapy (XRT) in early-stage epithelial cancer: a comparison of studies**

Lio Yu<sup>1</sup>, Mairead Moloney<sup>2</sup>, Songzhu Zheng<sup>3</sup>, and James Rogers<sup>4</sup>

<sup>1</sup>Laserderm Dermatology, Smithtown, NY

<sup>2</sup>New York Institute of Technology College of Osteopathic Medicine, Glen Head, NY

<sup>3</sup>Department of Applied Mathematics and Statistics, Stony Brook University

<sup>4</sup>Summit Analytical LLC, Denver, CO

Corresponding Author:

Lio Yu, M.D., DABR

Address: Laserderm Dermatology, 327 Middle Country Rd, Smithtown, NY 11787, USA

Email: [lio.yu@protonmail.com](mailto:lio.yu@protonmail.com)

## Abstract

### Background

To compare the effectiveness of high-resolution dermal ultrasound (US) guided superficial radiotherapy (SRT) to non-image-guided radiotherapy in the treatment of early-stage epithelial cancer.

### Methods

A high-resolution dermal ultrasound (US) image guided form of superficial radiation therapy (designated here as US-SRT) was developed in 2013 where the tumor configuration and depth can be visualized prior to, during, and subsequent to treatments, using a 22 megahertz (MHz) dermal ultrasound (US) with a doppler component. We previously published the results using this technology to treat 2917 early-stage epithelial cancers showing a high local control (LC) rate of 99.3%. We compared these results with similar American studies from a comprehensive literature search used in an article/guideline published by American Society of Radiation Oncology (ASTRO) on curative radiation treatment of basal cell carcinoma (BCC), squamous cell carcinoma (SCC) and squamous cell carcinoma in-situ (SCCIS) lesions from 1988 to 2018. Only U.S. based studies with greater than 100 cases with similar patient/lesion characteristics and stages treated by external beam, electron, or superficial/orthovoltage radiation therapy were included in the criteria for selection. The resultant 4 studies had appropriate comparable cases identified and the data analyzed/calculated with regard to local control. Logistic regression analysis was performed comparing each study to US-SRT individually and collectively with stratification by histology (BCC, SCC, and SCCIS).

## Results

US-SRT LC was found to be statistically superior to each of the 4 non-image-guided radiation therapy studies individually and collectively (as well as stratified by histology subtype) with p-values ranging from  $p < 0.0001$  to  $p = 0.0438$ .

## Conclusions

Results of US-SRT in local control were statistically significantly superior across the board versus non-image-guided radiation modalities in treatment of epithelial NMSC and should be considered a new gold standard for treatment of early-stage cutaneous BCC, SCC, and SCCIS.

*Keywords:* non-melanoma skin cancer; superficial radiation therapy, image-guidance, statistics, local control, comparison

## Background

Non-melanoma skin cancer (NMSC) is the most common cancer diagnosed in the United States and it is comprised mostly of basal cell carcinoma (BCC), squamous cell carcinoma (SCC), and squamous cell carcinoma in-situ (SCCIS). [1] The most current estimates of NMSC incidence are from 2012, where it was estimated that 5.43 million NMSC lesions in 3.32 million individuals in the U.S. were diagnosed. [2] The incidence is expected to be increasing by two to three percent yearly. [3] In 2022, this translates to 4.05 to 4.66 million individuals in 6.62 to 7.30 million lesions.

Despite NMSC having a low mortality, high cure rates, rare metastasis, and only accounting for 0.1% of cancer deaths, the standard of treatment is surgical removal. [1] Surgical options consist of Mohs micrographic surgery (MMS), standard surgical excision, shave removal, curettage, and electrodesiccation. [4] However, numerous nonsurgical, non-invasive modalities exist including topical treatments (i.e., imiquimod, 5-fluorouracil [5-FU] etc.), cryotherapy, photodynamic therapy (PDT), laser therapy, and radiotherapy with several techniques available within each category. However, surgery, specifically MMS, has remained the mainstay of treatment as the literature promises the highest cure-rates at around 99%. [5] [6]

Multiple radiation modalities exist for the treatment of NMSC, including brachytherapy, electron beam radiotherapy (EBRT), external radiation therapy (XRT), and superficial radiation therapy (SRT). Specifically, superficial radiation therapy, has been used by dermatologists for the past century to treat NMSC. [7] With the advent of MMS, this modality fell out of favor. However, more recently there has been advancements to SRT, including the use of a high frequency 22 megahertz (MHz) dermal ultrasound (US) to visualize superficial depth of the skin. This has led to the development of high-resolution dermal ultrasound image guided superficial radiotherapy,

designated here as (US-SRT) and commercially known as image-guided SRT (IGSRT).

Commercial units became available in 2014 that allowed for lesion visualization prior to, during, and after treatment. A recently published study by Yu *et al.* using US-SRT (“IGSRT”) to treat 2917 early-stage keratinocytic cancers yielded a high local control (LC) rate of 99.3%. [8] An updated abstract that added 93 patients and 133 lesions for a total of 1725 patients with 3050 early-stage keratinocytic lesions showed a continued high local control (LC) of 99.2%. [9] This suggests that US-SRT can offer comparable cure rates to that of the current “gold standard” treatment modality, namely MMS, for early-stage NMSC without needing surgery and its associated risks, discomfort, and cosmetic sequelae.<sup>A</sup>

## Objective

To statistically evaluate the local control (LC) differences, if any, of US-SRT versus non-image-guided radiotherapy modalities for the treatment of early-stage epithelial cancer.

## Methods

*Source Information.* US-SRT results have been investigated in two seminal studies referenced hereafter as the 2021 US-SRT study and the 2022 US-SRT study. [8] [9] Data from the 2021 US-SRT study was obtained via direct chart analysis of patients with histopathologic confirmed NMSC treated with US-SRT from multiple institutions. Data from the 2022 US-SRT study utilized the same data from the 2021 US-SRT study with the addition of 133 histopathological confirmed NMSC from 94 patients with updated follow-up intervals. Data on

---

<sup>A</sup> Per the American Academy of Dermatology practice guidelines, Mohs micrographic survey (MMS) local control is reported to have local control (LC) of 99% for basal cell carcinoma (BCC) and about 97% for cutaneous squamous cell carcinoma (SCC). [4] [6] The 5-year local recurrence rate for primary SCC lesions treated with MMS is reported to be 3.1%. The 5-year local recurrence rate for primary BCC lesions treated with MMS is reported to be 1%. Our reported high resolution dermal ultrasound image guided superficial radiotherapy LC is 99.1% (2021 US-SRT study<sup>8</sup>) and 98.9% (2022 US-SRT study<sup>9</sup>) for BCC and is 99.3% (2021 US-SRT study<sup>8</sup>) and 99.2% (2022 US-SRT study<sup>9</sup>) for SCC, and thus appears to be as good as MMS for BCC and potentially better for SCC.

the additional 133 histopathologic confirmed NMSC in 94 patients was previously published. [10]

US-SRT outcomes included in the present analyses are from a subset of the 2021 US-SRT study patients who have a follow-up of greater than 52 weeks; and are from the entire study population of the 2022 US-SRT study.

The American Society of Radiation Oncology (ASTRO) published a literature review containing 143 studies on curative radiation treatment for NMSC. [11] A subset of modern, pertinent, comparable studies that utilized superficial radiotherapy (SRT) and external radiotherapy (XRT) without image-guidance were identified as meeting the following inclusion/exclusion criteria.

- Inclusion: Only studies performed in the USA
- Exclusion: Meta-analysis, brachytherapy, pre-operative, post-operative +/- chemo/targeted agents used, recurrent or predominately recurrent, prior radiotherapy, T4 only/predominant, metastatic to parotids, involvement of parotids, wound healing only, no local control reported, perineural invasion in  $\geq 50\%$  of cases, and those lesions arising from scar.

These criteria resulted in four high-quality, recent, evidenced-based studies, each with greater than 100 subjects. The four studies provided the XRT/SRT outcome data for this study and are hereafter referenced as the Lovett study, Locke study, Silverman study, and Cогnetta study. [12] [13] [14] [15]

Local Control (LC) Calculation. Lesion counts for the two US-SRT studies and the four XRT/SRT studies were used to compute LC as “Number of lesions that did not recur / Total

number of lesions”. Lesions were analyzed as independent events. Only  $T_{is}$ ,  $T_1$  and  $T_2$  lesions were included.

*Statistical Analysis.* Data availability in the two US-SRT studies and the four XRT/SRT studies made it possible to compare each US-SRT study (i.e., Yu study and Moloney study) to the following XRT/SRT studies: Lovett, Locke, Silverman, and Cогnetta for BCC; Lovett, Locke, and Cогnetta for SCC; and Cогnetta for SCCIS. For each comparison, a logistic model was implemented that contained the effect of treatment with treatment levels defined as the studies under consideration. Odds ratios were then derived that compared the US-SRT studies to each available XRT/SRT study and to all XRT/SRT studies combined.

*Role of the Funding Source.* The sponsor of the study (SkinCure Oncology) was not involved in the study design, collection, analysis, interpretation of data, or writing of the report. The decision to submit the paper for publication was solely that of Dr. Lio Yu and the co-authors.

## Results

Table 1 compares each of the US-SRT studies to each XRT/SRT study (Lovett, Locke, Silverman, and Cогnetta).<sup>B</sup> Comparisons using odds ratios from logistic regression models were made for BCC, SCC, and SCCIS, individually, with odds ratios greater than unity (1) favoring US-SRT. As indicated in Table 1, not all studies evaluated all histologic tumor categories (SCC,

---

<sup>B</sup> Minor differences may be present in the raw numbers of each histologic subtype [BCC, SCC, SCCIS] used in the original analysis by Yu et al. and the raw numbers used in this analysis.<sup>8</sup> These differences can be attributed to variations in data filtering. For instance, follow-up data was calculated in days and converted to weeks and months, thus data may be filtered by follow-up time in days, weeks, or months. Additionally, seven lesions had multiple histologic subtypes and can be included in both histology categories in this analysis. Despite these minor differences in total lesion number per histologic category, the overall local control rate results remained substantively unchanged.

SCCIS, BCC), and therefore, only studies that included a given histologic tumor category could be used as a comparator study in the evaluation of that same histologic tumor category. Table 1 also reports comparisons by tumor category between each US-SRT study and all comparator XRT/SRT studies combined. Finally, the LC odds can be converted to a probability with an asymmetrical 95% confidence interval. For the 2021 and 2022 US-SRT studies, separately, LC probabilities and 95% confidence intervals were calculated for each US-SRT study. This allows an odds ratio comparison to be envisioned as a plotted difference in LC probabilities.

Table 1 indicates that US-SRT LC was statistically superior to the comparator XRT/SRT studies individually, collectively, and stratified by histologic tumor type, with p-values ranging from  $p < 0.0001$  to  $p = 0.0438$ . Figure 1 plots the LC probabilities for each US-SRT study compared to each XRT/SRT study separated by histology. Figure 1 affirms graphically the findings shown in Table 1.



**Table 1. Recurrence and Local Control Events for Basal Cell Carcinoma (BCC), Squamous Cell Carcinoma (SCC) and Squamous Cell Carcinoma In Situ (SCCIS) with High resolution dermal ultrasound image guided superficial radiotherapy (US-SRT) versus External Radiation Therapy (XRT) / Superficial Radiation Therapy (SRT) Contrasts Using Odds Ratios (OR)**

| Lesion | Treatment | Study          | Outcome    |                     |               | Odds Ratio<br>(XRT/SRT over US-SRT)<br>(95% Confidence Limits) |         |                      |         |
|--------|-----------|----------------|------------|---------------------|---------------|----------------------------------------------------------------|---------|----------------------|---------|
|        |           |                | Recurrence |                     | Local Control | Yu 2021: US-SRT                                                |         | Moloney 2022: US-SRT |         |
|        |           |                | (n)        | (%)                 | (n)           | OR                                                             | p-value | OR                   | p-value |
| BCC    | US-SRT    | Yu (2021)      | 6          | 0.9                 | 698           | OR                                                             | p-value | OR                   | p-value |
|        |           | Moloney (2022) | 16         | 1.1                 | 1471          |                                                                |         |                      |         |
|        | XRT/SRT   | Lovett         | 20         | 9.0                 | 202           | 11.5<br>(4.6, 29.1)                                            | <.0001  | 9.1<br>(4.6, 17.9)   | <.0001  |
|        |           | Locke          | 21         | 6.4                 | 305           | 8.0<br>(3.2, 20.0)                                             | <.0001  | 6.3<br>(3.3, 12.3)   | <.0001  |
|        |           | Silverman      | 52         | 6.0                 | 810           | 7.5<br>(3.2, 17.5)                                             | <.0001  | 5.9<br>(3.3, 10.4)   | <.0001  |
|        |           | Cognetta       | 22         | 3.1                 | 690           | 3.7<br>(1.5, 9.2)                                              | 0.0047  | 2.9<br>(1.5, 5.6)    | 0.0012  |
|        |           | All            | 115        | 5.4                 | 2007          | 7.1<br>(3.1,16.3)                                              | <.0001  | 5.6<br>(3.3, 9.6)    | <.0001  |
| SCC    | US-SRT    | Yu (2021)      | 4          | 0.7                 | 544           | OR                                                             | p-value | OR                   | p-value |
|        |           | Moloney (2022) | 7          | 0.8                 | 926           |                                                                |         |                      |         |
|        | XRT/SRT   | Lovett         | 14         | 18.9                | 60            | 31.7<br>(10.1, 99.5)                                           | <.0001  | 30.9<br>(12.0, 79.3) | <.0001  |
|        |           | Locke          | 15         | 15.2                | 84            | 24.3<br>(7.9, 74.9)                                            | <.0001  | 23.6<br>(9.4, 59.5)  | <.0001  |
|        |           | Cognetta       | 4          | 3.0                 | 129           | 4.2<br>(1.0, 17.1)                                             | 0.0438  | 4.1<br>(1.2, 14.2)   | 0.0259  |
| All    | 33        | 10.8           | 273        | 14.8<br>(5.1, 43.3) | <.0001        | 14.4<br>(6.1, 33.9)                                            | <.0001  |                      |         |
| SCCIS  | US-SRT    | Yu (2021)      | 2          | 0.5                 | 415           | OR                                                             | p-value | OR                   | p-value |
|        |           | Moloney (2022) | 1          | 0.2                 | 649           |                                                                |         |                      |         |
|        | XRT/SRT   | Cognetta       | 19         | 2.2                 | 842           | 4.7<br>(1.1, 20.2)                                             | 0.0385  | 14.6<br>(2.0, 109.7) | 0.0090  |

Notes: Silverman presented 2-year and 5-year follow-up results. Mean 5-year follow-up was used. Mean follow-up for Yu, Moloney, Lovett, Locke, and Cognetta, respectively, was 2-1, 2-1, 5, 5 and 2-6 years. Silverman presented no SCC data. Only Cognetta presented SCCIS.

**Figure 1. Basal Cell Carcinoma (BCC), Squamous Cell Carcinoma (SCC) and Squamous Cell Carcinoma In Situ (SCCIS) Probabilities of Local Control for the High resolution dermal ultrasound image guided superficial radiotherapy (US-SRT) and External Radiation Therapy (XRT) / Superficial Radiation Therapy (SRT) Investigations**

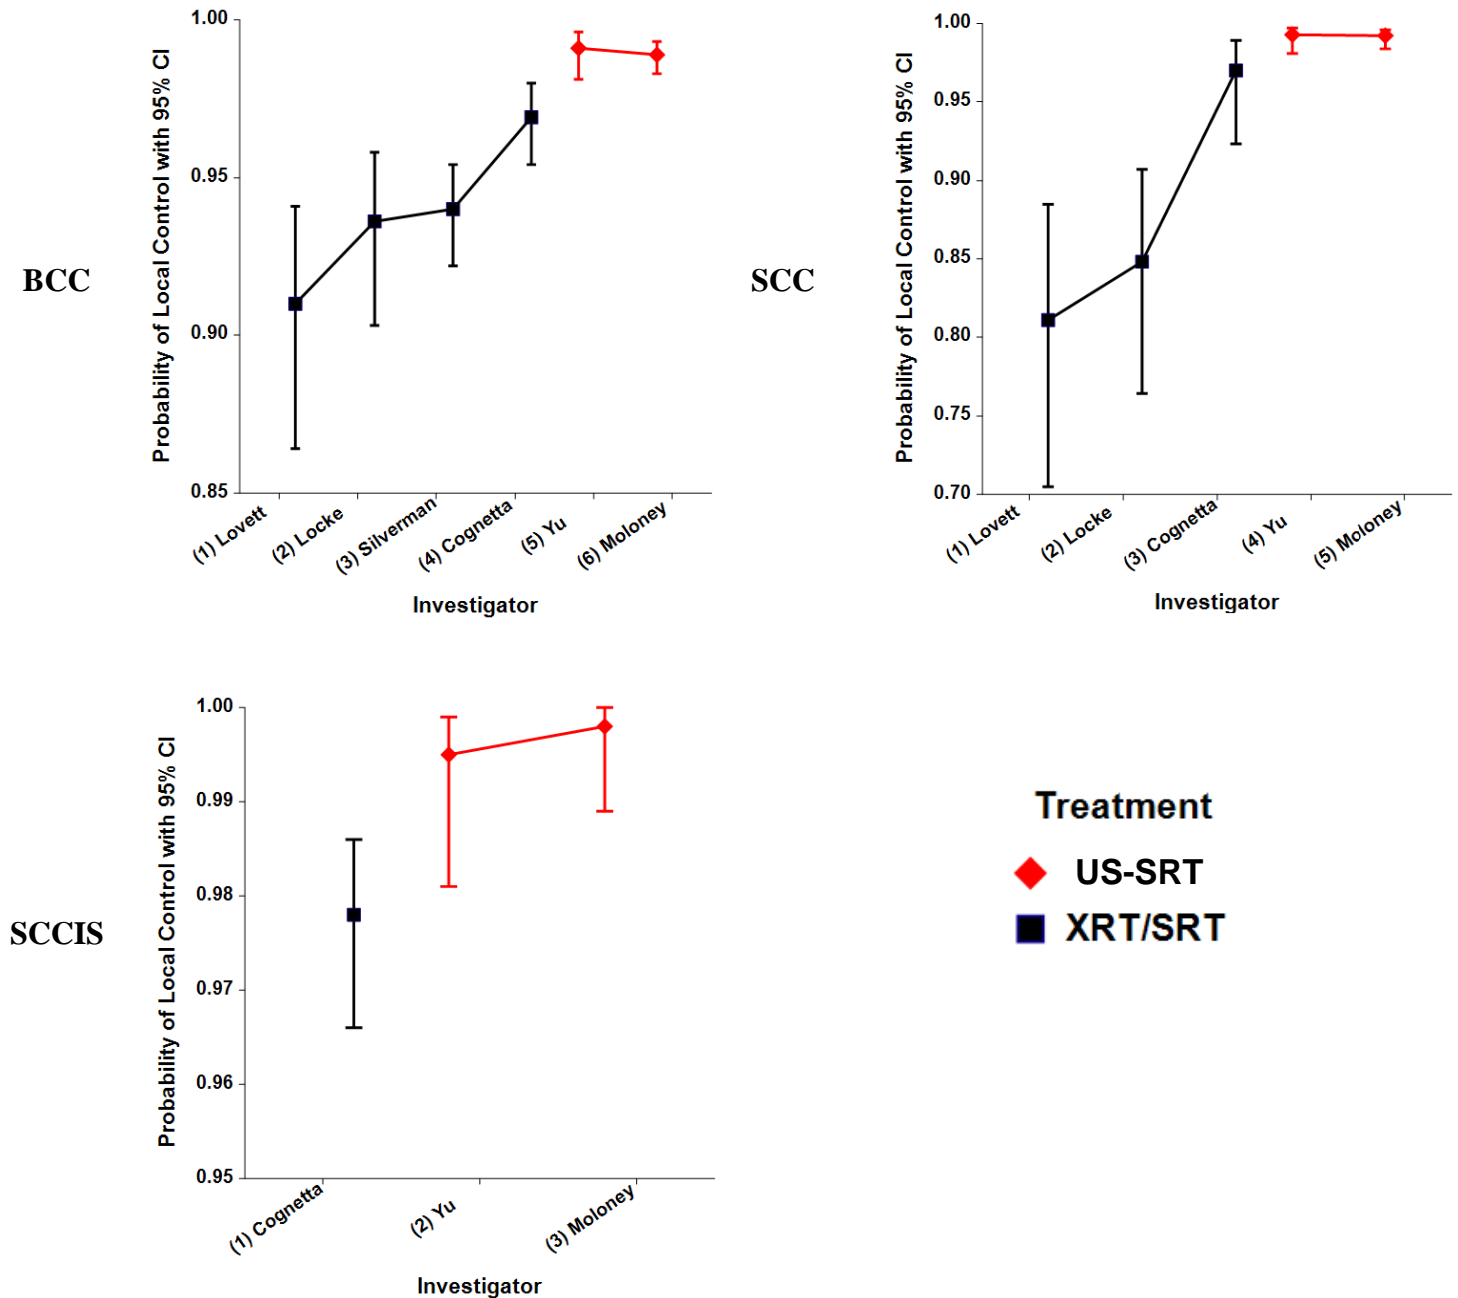

## Discussion

Our analysis shows US-SRT confers a statistically significant improvement in local control for all histologic subtypes of epithelial NMSC (BCC, SCC, SCCIS) compared to all four high-quality, recent, large studies using non-image-guided forms of radiotherapy (XRT/SRT). The improvement in local control can be attributed to the image-guided component of superficial radiotherapy, as the high definition integrated dermal ultrasound with doppler features allows for visualization of the early-stage lesions' depth, breadth, and overall configuration prior to, during, and after treatment. Visualization during treatment allows for the treatment provider to adjust radiotherapy dosages and energies of penetration daily if necessary. Visualization after treatment allows for confirmation of lesion resolution/response.

Advantages of US-SRT include high cure-rates as demonstrated in the 2021 and 2022 papers. It is cost effective, due to its low-recurrence rate. It offers cosmetic benefits as it is tissue sparing and the majority of NMSC lesions occur in cosmetically sensitive areas, such as the head and neck. Patients can avoid pain, scarring and risk of infection and/or bleeding since this is a non-surgical treatment modality. As many patients often have more than one lesion diagnosed simultaneously, multiple lesions can also be treated synchronously with US-SRT. Offices that use US-SRT have reported overall excellent (> 95%) patient satisfaction and provider satisfaction (internal data).

Absolute and relative contraindications to US-SRT, as previously described in the 2021 US-SRT studies, include lesion invasion to underlying bone or muscle, thickness > 6mm, previous radiation to the same lesion site, ataxia telangiectasia, active connective tissue disease, active lupus or rheumatologic disease, concomitant management with radiation sensitizing chemotherapy agent, T4 stage, and node positive status. [8]

US-SRT could be considered the preferred standard non-surgical radiotherapeutic treatment modality for appropriate patients with early-stage epithelial skin cancers (BCC, SCC, SCCIS) with comparable LC to MMS without the drawbacks of surgery. At the minimum, patients should be presented with the option to have their NMSC treated with US-SRT.

### **Limitations**

No randomized controlled trial exists for direct comparison of US-SRT to radiotherapy modalities, including superficial and external radiotherapy. The follow-up periods in this paper, though long enough to reasonably assure meaningful and accurate US-SRT to XRT/SRT comparisons, are unequal among studies.

### **Conclusion**

Image guidance with high resolution dermal ultrasound in the form of US-SRT is shown to confer a statistically significant advantage in lesion local control over non- image guided forms of SRT or XRT in all subtypes of cutaneous epithelial NMSC and should be considered the preferred standard of non-surgical treatment for early stage cutaneous BCC, SCC, and SCCIS.

## **List of Abbreviations**

SRT – Superficial Radiotherapy

MHz - Megahertz

LC – Local Control

ASTRO – American Society of Radiation Oncology

BCC – Basal Cell Carcinoma

SCC – Squamous Cell Carcinoma

SCCIS – Squamous Cell Carcinoma in-Situ

NMSC – Non-Melanoma Skin Cancer

MMS – Mohs Micrographic Surgery

PDT – Photodynamic Therapy

EBRT – Electron Beam Radiotherapy

XRT – External Radiation Therapy

IGSRT – Image-Guided Superficial Radiation Therapy

## **Declarations**

### **Ethics approval and consent to participate**

This study was performed in compliance with the pertinent sections of the Helsinki Declaration and its amendments. All methods were carried out in accordance with relevant guidelines and regulations. The protocol for this manuscript was reviewed by the WCG IRB Affairs Department located at 1019 39<sup>th</sup> Ave SE, Suite 120, Puyallup, WA 98374 and was determined to be exempt from IRB approval under 45 CFR 46.104 (d)(4), because the research involves the use of identifiable private information; and information is recorded by the investigator in such a manner that the identity of the human subject cannot readily be ascertained directly or through identifiers linked to the subjects, the investigator does not contact the subjects, and the investigator will not re-identify subjects.

Any health information used in this study has been de-identified for use in this study. All patients gave informed consent before treatment.

### **Consent for publication**

Not applicable

### **Availability of data and materials**

Deidentified data are available on request from the corresponding author – Dr. Lio Yu at [lio.yu@protonmail.com](mailto:lio.yu@protonmail.com). Data will be available for request with publication for period of at least 1 year.

Additional analyses may be available upon request from Dr. Lio Yu at [lio.yu@protonmail.com](mailto:lio.yu@protonmail.com), including but not limited to all odds and probabilities using logistic regression, conversion of

some of the odds to probabilities with asymmetric confidence limits, raw percentages, and raw odds.

### **Competing Interests**

Dr. Lio Yu is the National Radiation Oncologist for Skin Cure Oncology and has received research, speaking and/or consulting support from Skin Cure Oncology. He has served on an advisory board for Bayer Pharmaceuticals previously. Mairead Moloney has no conflicts of interest to disclose. Songzhu Zheng has no conflicts of interest to disclose. Dr. James Rogers is a managing member of Summit Analytical, LLC, which was contracted to provide statistical analysis for this study. James Rogers received payment for the statistical analysis services he performed from, and thereby has a financial relationship with Next Step Business Services, LLC (a closely held company owned by Dr. Lio Yu). The payment to Dr. Rogers was made to his own closely held company known as Summit Analytical LLC).

### **Funding**

SkinCure Oncology provided funding for Dr. Lio Yu's time as an independent contractor for independent researching and writing of this paper. This included reimbursement of professional statistical service fees paid. The sponsor of the study (SkinCure Oncology) was not involved in the study design, collection, analysis, interpretation of data, or writing of the manuscript. Writing of this paper and the submission process was solely that of Dr. Lio Yu and co-authors.

### **Authors' contributions**

Drafts of the manuscript were shared among the authors. All authors read and approved the final manuscript.

Dr. Lio Yu is responsible for conceptualization of the study design, methodology, data curation, funding acquisition, project administration, writing – original draft, writing – review & editing, supervision, investigation, visualization, and resources. Mairead Moloney was responsible for the literature search, writing – original draft, and writing – review & editing, and visualization. Songzhu Zheng was responsible for formal analysis, validation, and software. Dr. James Rogers was responsible for formal analysis, validation, software, writing – review & editing, figures, investigation, and visualization.

Songzhu Zheng directly accessed and verified the underlying data reported in the manuscript. Dr. James Rogers had access to the underlying data and applied statistical analysis to the data in tabulated format. The logistic analysis was validated under Summit Analytical SOPs.

No medical writer or editor was used or involved in preparing this paper for publication.

### **Acknowledgements**

–We would like to thank the authors of the studies used for comparison analysis in this manuscript and for data made available for this purpose. We would like to thank the patients for their information used in this study.



## References

- [1] "Cancer A-Z," 26 July 2019. [Online]. Available: <https://www.cancer.org/cancer/basal-and-squamous-cell-skin-cancer/about/what-is-basal-and-squamous-cell.html#references>.  
[Accessed April 2022].
- [2] H. Rogers and et al., "Incidence Estimate of Nonmelanoma Skin Cancer (Keratinocyte Carcinomas) in the US Population, 2012," *JAMA Dermatology*, vol. 151, no. 10, pp. 1081-1086, October 2015.
- [3] I. Marcil and R. S. Stern, "Risk of developing a subsequent nonmelanoma skin cancer in patients with a history of nonmelanoma skin cancer: a critical review of the literature and meta-analysis," *Arch Dermatol*, vol. 136, no. [https://doi:10.1001/archderm.136.12.1524](https://doi.org/10.1001/archderm.136.12.1524), pp. 1524-1530, December 2000.
- [4] A. Fahradyan and et al., "Updates on the Management of Non-Melanoma Skin Cancer (NMSC)," *Healthcare*, vol. 5, no. 4, 1 November 2017.
- [5] M. Alam and et al., "Guidelines of care for the management of cutaneous squamous cell carcinoma," *Journal of the American Academy of Dermatology (JAAD)*, vol. 78, no. 3, pp. 560-578. <https://doi.org/10.1016/j.jaad.2017.10.007>, March 2018.

- [6] C. Bichakjian and et al., "Guidelines of care for the management of basal cell carcinoma," *JAAD*, vol. 78, no. 3, pp. 540-559, 10 January 2018.
- [7] A. Cagnetta, C. Wolfe, D. Goldberg and H. Hong, "Practice and Educational Gaps in Radiation Therapy in Dermatology," *Dermatologic Clinics*, vol. 34, no. 3, pp. 319-333, 1 July 2016.
- [8] L. Yu, C. Oh and C. Shea, "The Treatment of Non-Melanoma Skin Cancer with Image-Guided Superficial Radiation Therapy: An Analysis of 2917 Invasive and In Situ Keratinocytic Carcinoma Lesions," *Oncology and Therapy*, pp. 153-166, 5 February 2021.
- [9] M. Moloney, D. Ladd, D. Serure and L. Yu, *Updated Results and Subgroup Analysis of 1725 Patients Treated with Novel Technology using IGSRT, A multi-Institutional Study*, Portland, OR, 2022.
- [10] L. Yu and et al., "Enhancing Cosmesis While Achieving High Cure- Rates For Early-Stage Non-Melanoma Skin Cancer In The Outpatient Dermatology Clinic Using Novel Non-Invasive Modality," *American Journal of Biomedical Science & Research*, vol. 12, no. 6, pp. 525-532, 7 May 2021.
- [11] A. Likhacheva and et al., "Definitive and Postoperative Radiation Therapy for Basal and Squamous Cell Cancers of the Skin: Executive Summary of an American Society for Radiation Oncology Clinical Practice Guideline," *Practical Radiation Oncology*, vol. 10, no. 1, pp. 8-20, 1 January 2020.
- [12] R. Lovett and et al., "External irradiation of epithelial skin cancer," *International Journal of*

*Radiation Oncology\*Biology\*Physics*, vol. 19, no. 2, pp. 235-242, 1 August 1990.

[13] J. Locke and et al., "Radiotherapy for epithelial skin cancer," *International Journal of Radiation Oncology\*Biology\*Physics*, vol. 51, no. 3, pp. 748-755, 1 November 2001.

[14] M. Silverman and et al., "Recurrence rates of treated basal cell carcinomas. Part 1: Overview," *The Journal of Dermatologica Surgery and Oncology*, vol. 17, no. 9, pp. 713-718, 17 September 1991.

[15] A. Cagnetta and et al., "Superficial x-ray in the treatment of basal and squamous cell carcinomas: A viable option in select patients," *JAAD*, vol. 66, no. 4, p. <https://doi.org/10.1016/j.jaad.2011.11.665>, 1 April 2012.
